# Supplementary material for: Synthesis of hyaluronic acid hydrogels by crosslinking the mixture of high-molecular-weight hyaluronic acid and low-molecular-weight hyaluronic acid with 1,4-butanediol diglycidyl ether
Source: Royal Society of Chemistry journal article supplement (doi:10.1039/c9ra09271d), 2020-01-01
Supplement: c9ra09271d1.pdf [file c9ra09271d1.pdf]

## Supplementary material

### $^1\text{H}$ NMR spectra of HA hydrogel hydrolyzed product

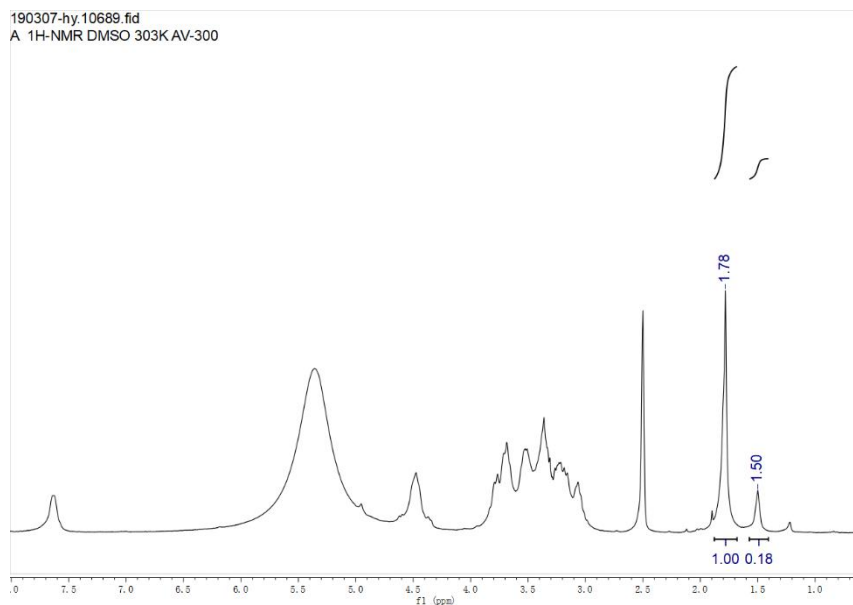

A

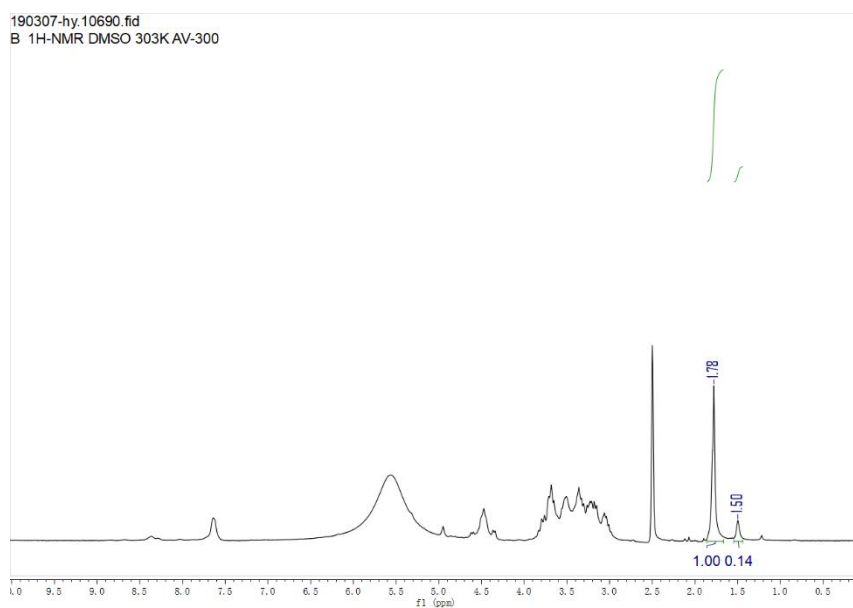

B

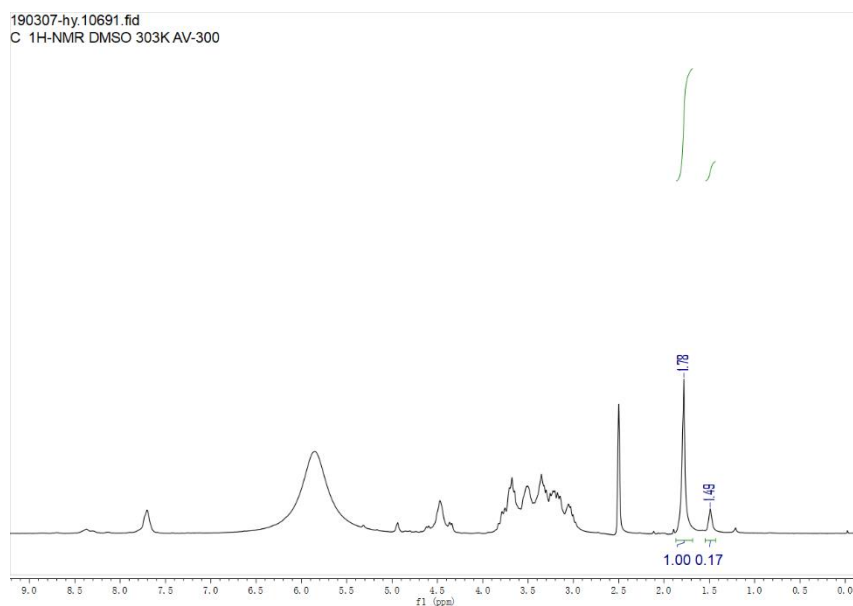

C

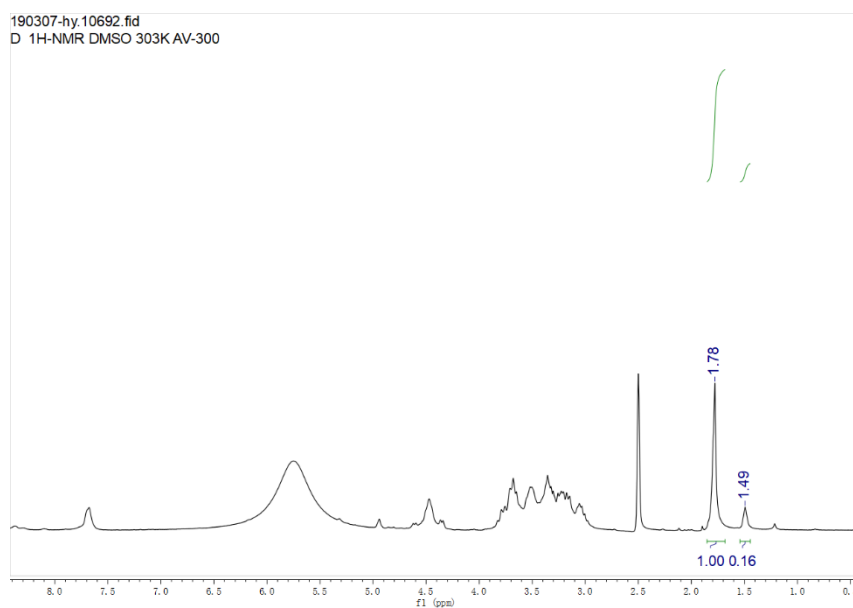

D

190307-hy.10695.fid  
G 1H-NMR DMSO 303K AV-300

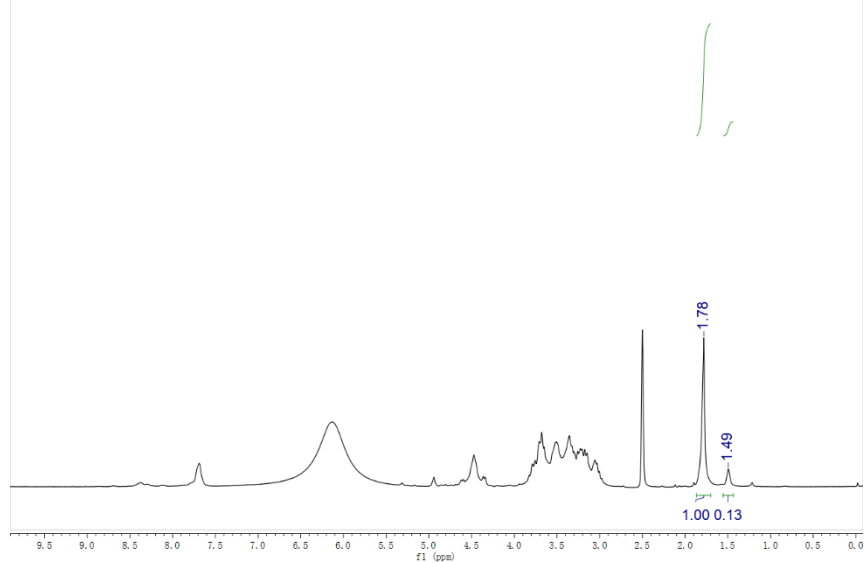

E
